# Supplementary material for: Overexpression of Interleukin-23 and Interleukin-17 in the Lesion of Pemphigus Vulgaris: A Preliminary Study
Source: Hindawi journal article supplement (doi:10.1155/2014/463928), 2014-01-01
Supplement: f1 [file 463928.f1.pdf]

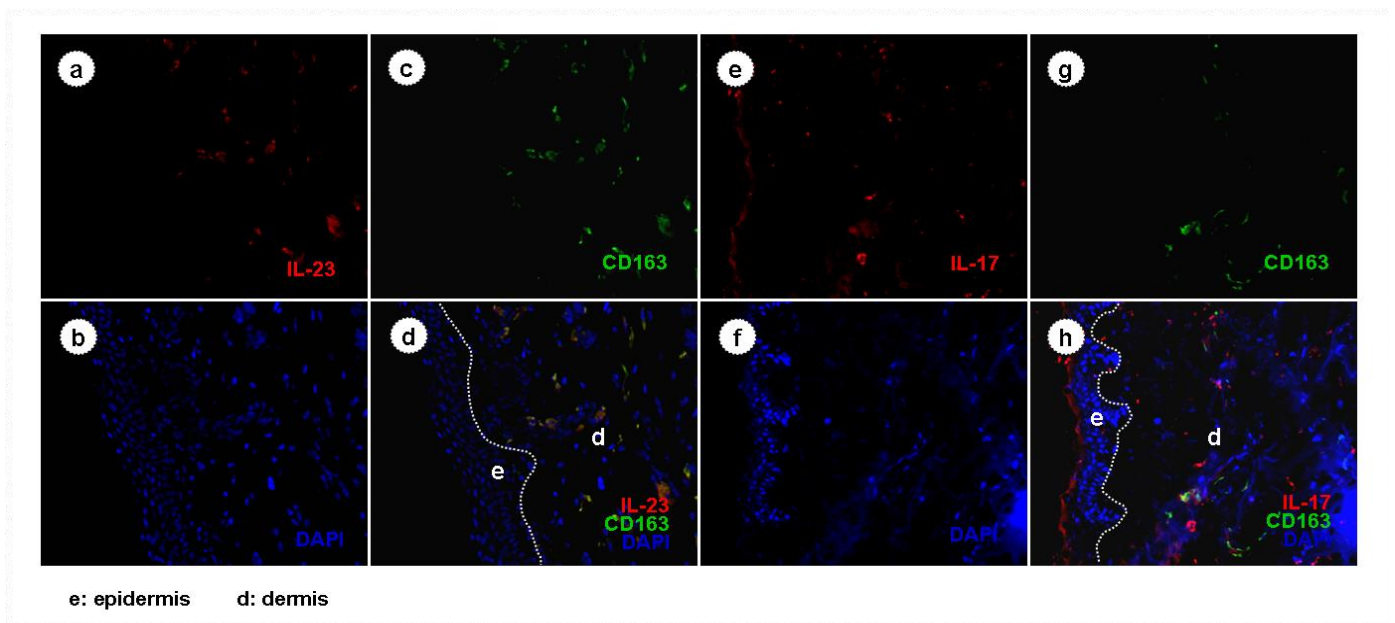

**Supplementary Fig.** Immunofluorescence studies of specimens from lesions of PF.

Positively stained cells were detected by antibodies to IL-23 (red) and CD163 (green)

(a-d), or by antibodies to IL-17 (red) and CD163 (green) (e-h).
